# Supplementary material for: Serratiopeptidase Affects the Physiology of Pseudomonas aeruginosa Isolates from Cystic Fibrosis Patients
Source: MDPI journal article supplement (doi:10.3390/ijms232012645), 2022-10-20
Supplement: s1 [file s1]

## *Supplementary Material*

**Table S1.** Antimicrobial profile of bacterial strains [36] and antimicrobial activity of SPEP.

| <b>Bacterial Strain</b> | <b>CAR</b> | <b>PTC</b> | <b>AM</b> | <b>QUIN</b> | <b>MB</b> | <b>CEF</b> | <b>COL</b> | <b>SPEP</b> |
|-------------------------|------------|------------|-----------|-------------|-----------|------------|------------|-------------|
| PA14                    | S          | S          | S         | S           | S         | S          | S          | >10000 U/ml |
| 23P                     | R          | S          | R         | R           | S         | R          | S          | >10000 U/ml |
| 27P                     | S          | S          | S         | S           | S         | S          | S          | >10000 U/ml |
| 28P                     | S          | S          | S         | S           | S         | S          | S          | >10000 U/ml |
| 30P                     | S          | S          | S         | S           | I         | S          | S          | >10000 U/ml |

CAR: Carbapenems; MP: Meropenem; IP: Imipenem; PTC: Piperacillin/tazobactam; AM: Aminoglycosides; QUIN: Quinolones; CI: Ciprofoxacin; LE: Levofloxacin; MB: Monobactam; CEF: Cephalosporins; COL: Colistin; R: Resistant; S: Susceptible; I: Intermediate.

**Figure S2.**

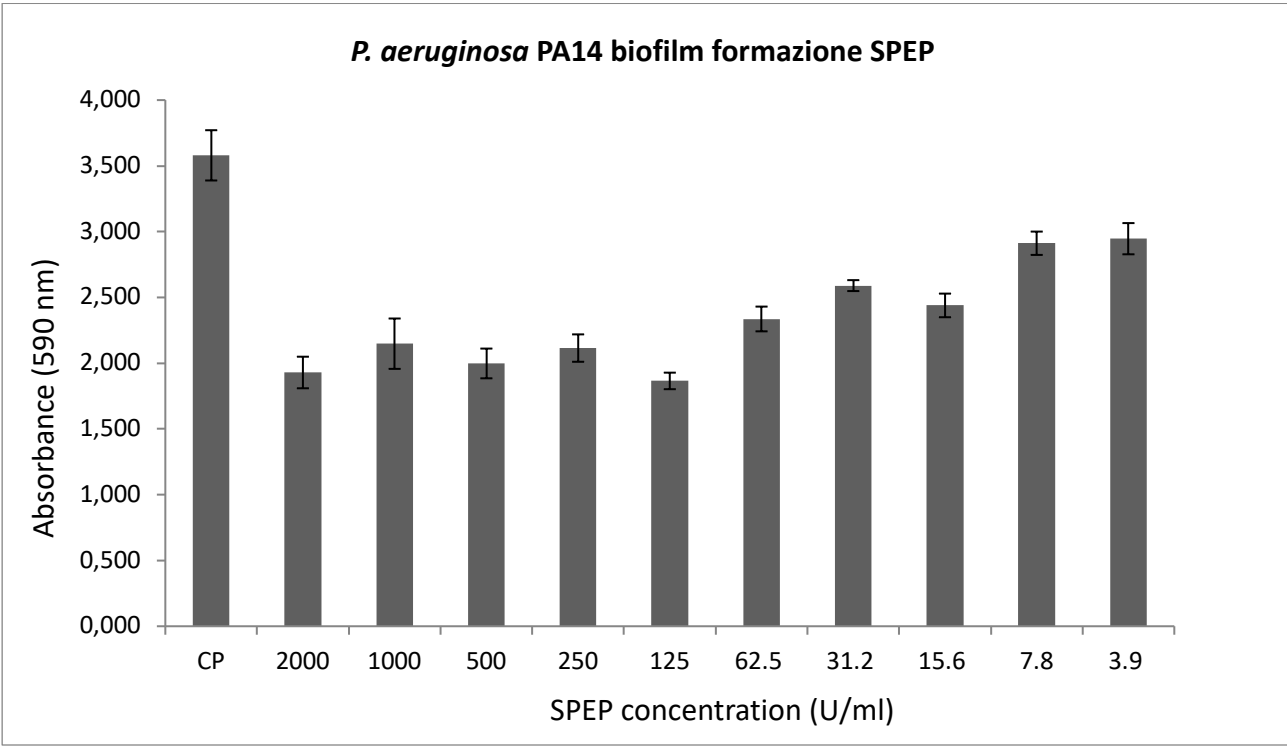

**Figure S1.** A dose-depending effect of SPEP on *P. aeruginosa* PA14 biofilm formation starting from a concentration of 2000 U/ml. Results were expressed as OD at 590 nm. Data reported are representative of three independent experiments. Error bars indicated the standard deviations of three measurements.

**Figure S2.**

**A**

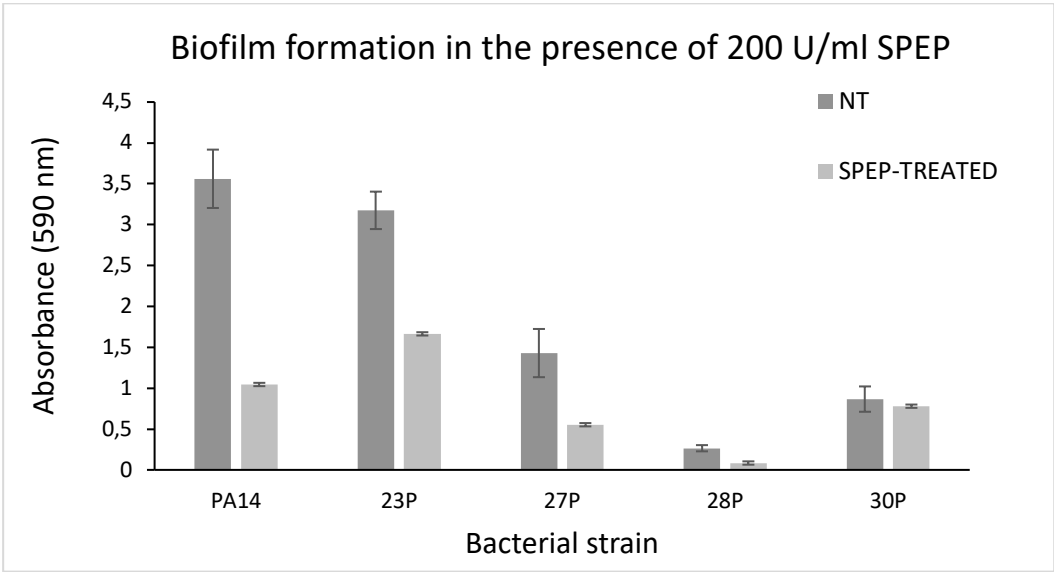

**B**

**PA14**

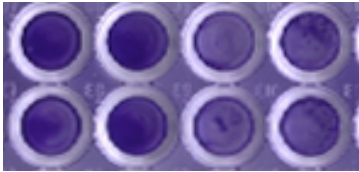

**23P**

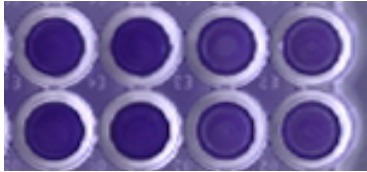

**27P**

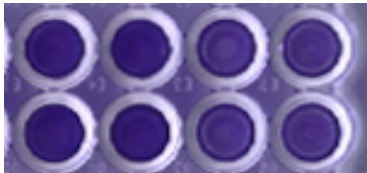

**28P**

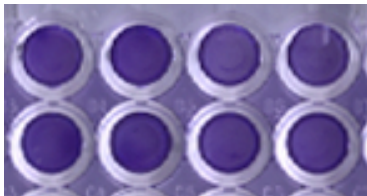

**30P**

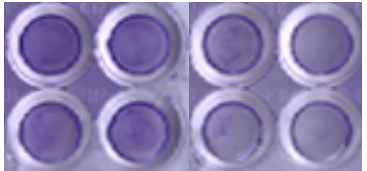

**C**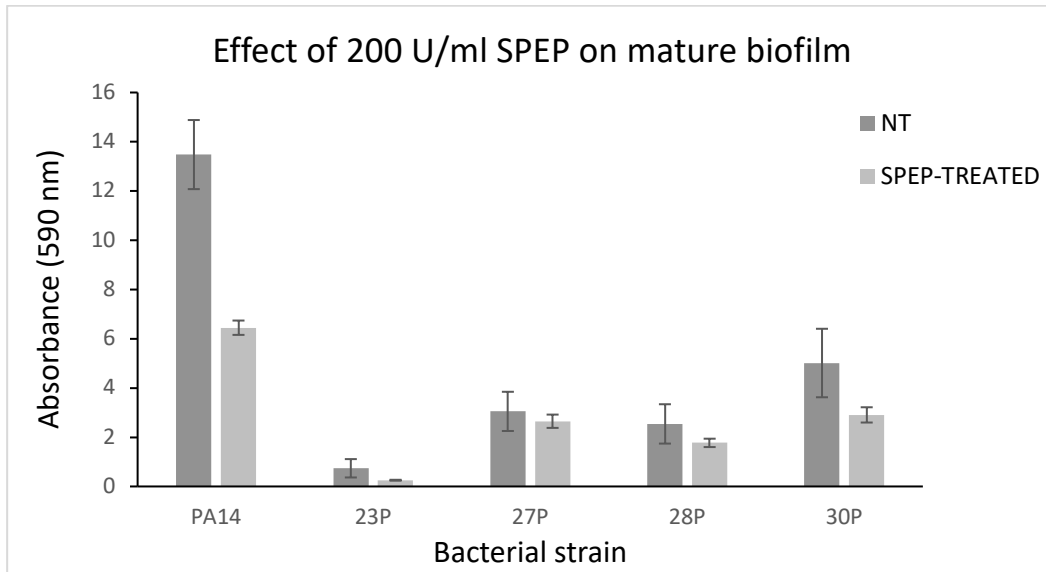**D****PA14**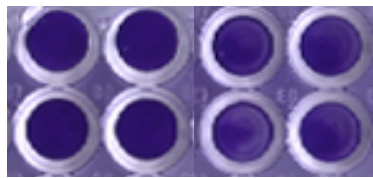**23P**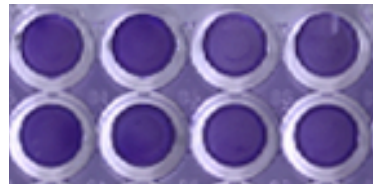**27P**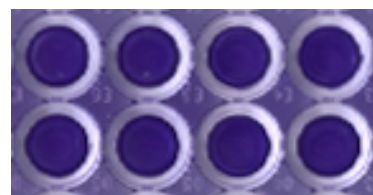**28P**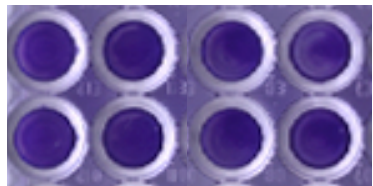**30P**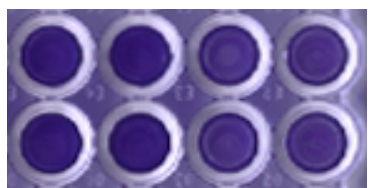



**Figure S2.** Effect of SPEP on biofilm formation of different clinical and reference strains. Panel A: Effect of SPEP on biofilm formation. In the ordinate axis is reported the absorbance at 590 nm. Each data point is composed of 4 independent experiments, each performed at least in 3-replicates. Panel B: Crystal violet coloration of biofilm formation of different clinical and reference strains in 96-wells. For each image, the first four wells represent the untreated samples, while the second four are SPEP-treated ones. Panel C: Effect of SPEP on 24 h mature biofilm. In the ordinate axis is reported the percentage of residual biofilm. Each data point is composed of 4 independent experiments, each performed at least in 3-replicates. Panel D: Crystal violet coloration of mature biofilm formation of different clinical and reference strains in 96-wells. For each image, the first four wells represent the untreated samples, while the second four are SPEP-treated ones.

**Figure S3.**  
**A**

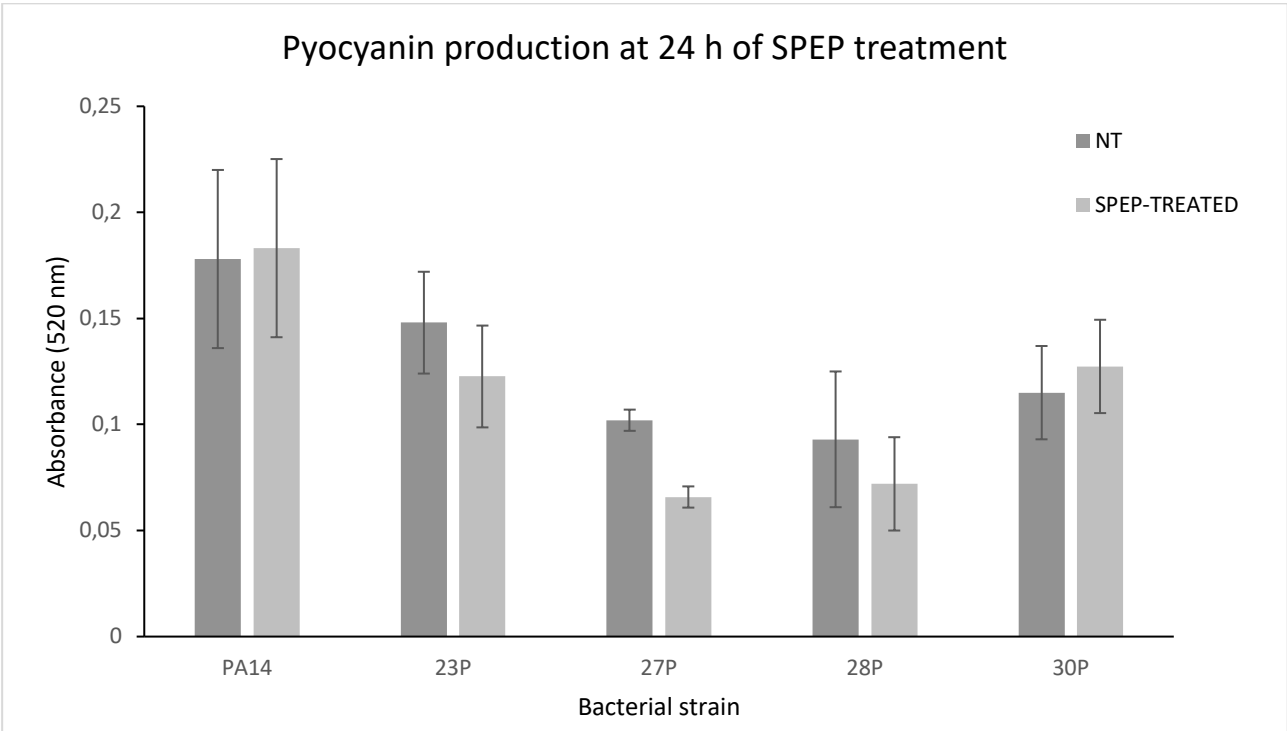

**B**

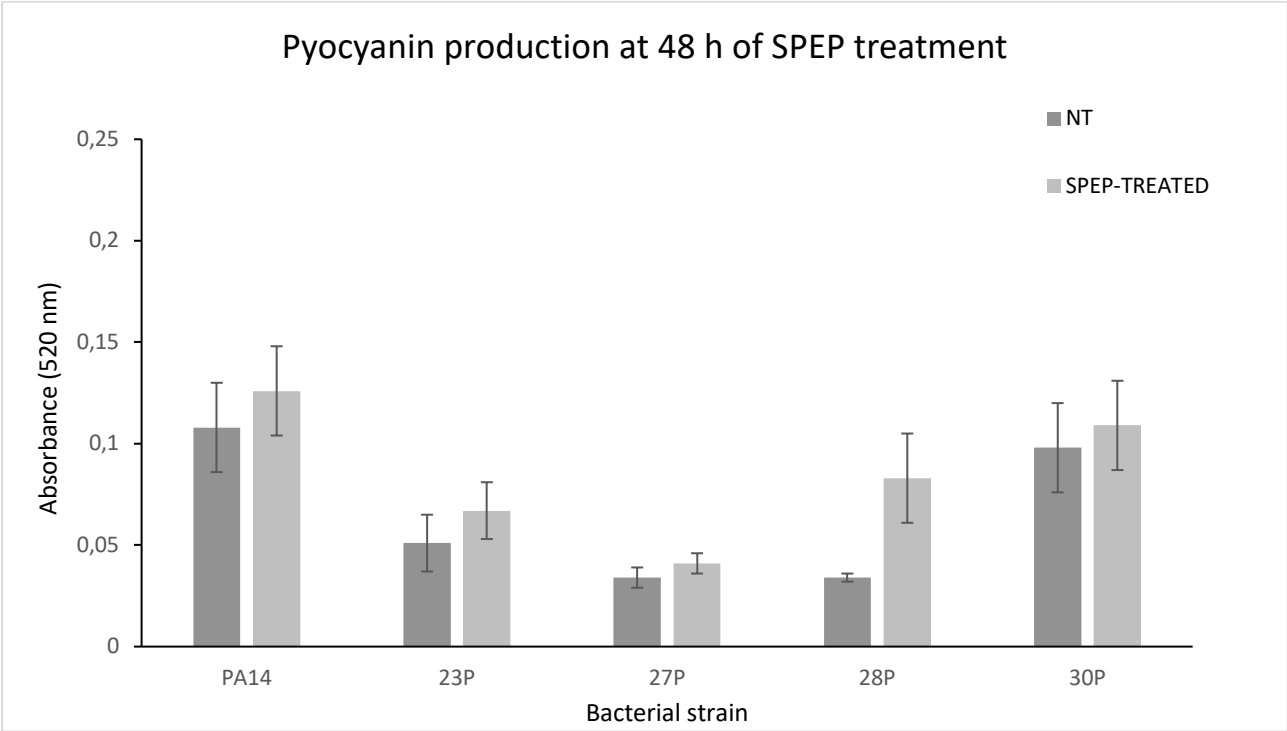

**C**

**PA14**

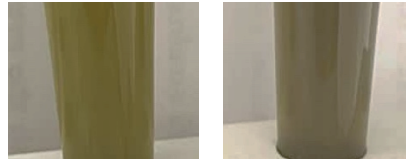

**23P**

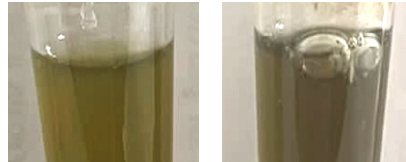

**27P**

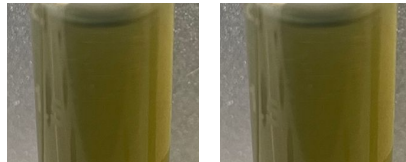

**28P**

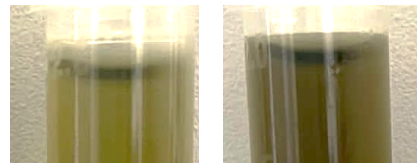

**30P**

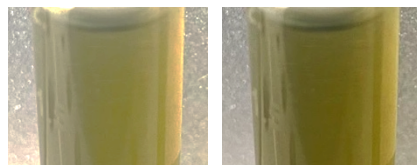

**Figure S3.** Effect of SPEP on pyocyanin produced after 24 (A) and 48 h (B) of growth. Data are reported as absorbance at 520 nm after pyocyanin extraction. Each data point is composed of 4 independent experiments, each performed in at least 3 replicates. Panel C: Images of SPEP effect (in the right images) on pyocyanin production of *P. aeruginosa* after 48 h of incubation.

**Figure S4.**

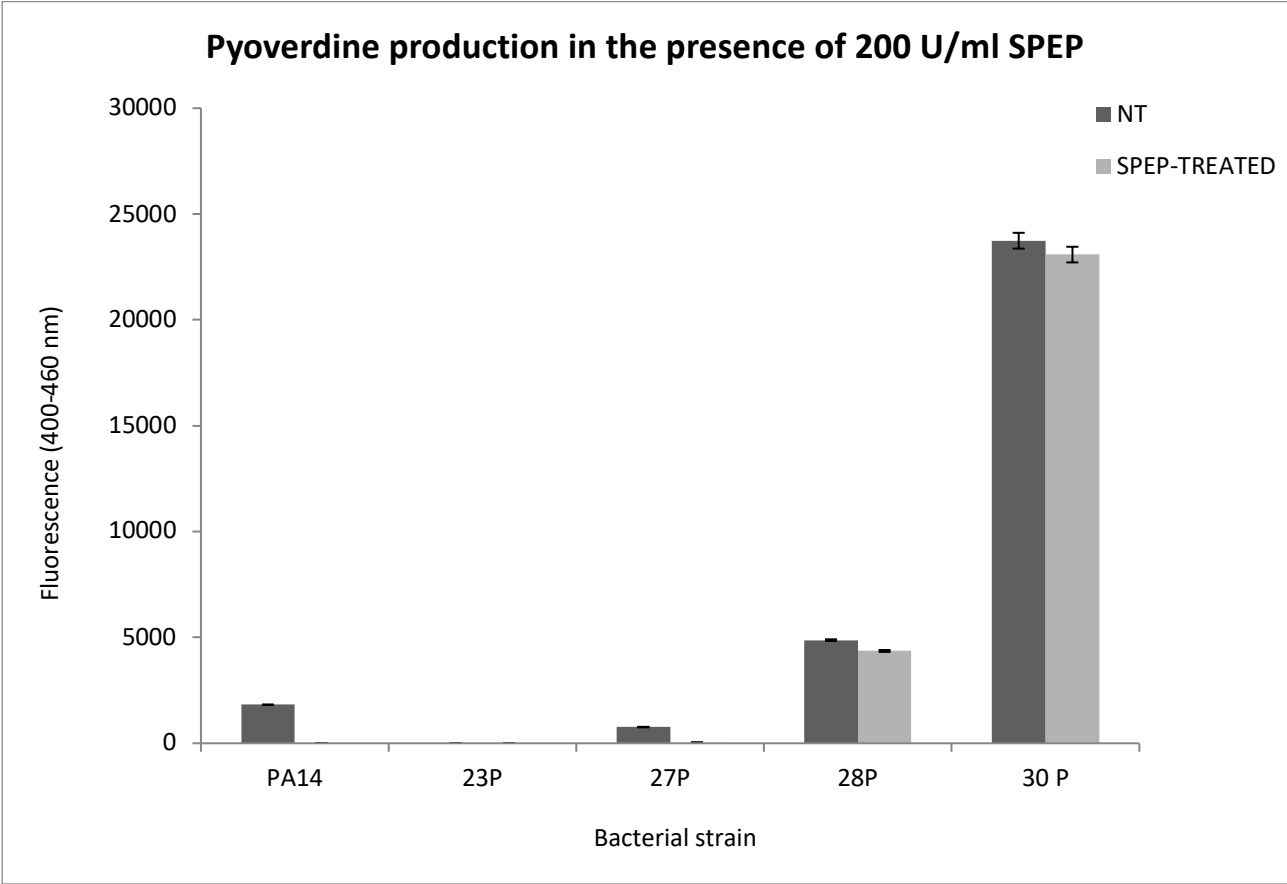

**Figure S4.** Effect of SPEP on pyoverdine produced after 48 h of growth. Data are reported as fluorescence recorded at 400 nm excitation 460 nm emission wavelengths. Each data point is composed of 4 independent experiments, each performed in at least 3-replicates. Error bars indicated the standard deviations of all the measurements.

**Figure S5.**

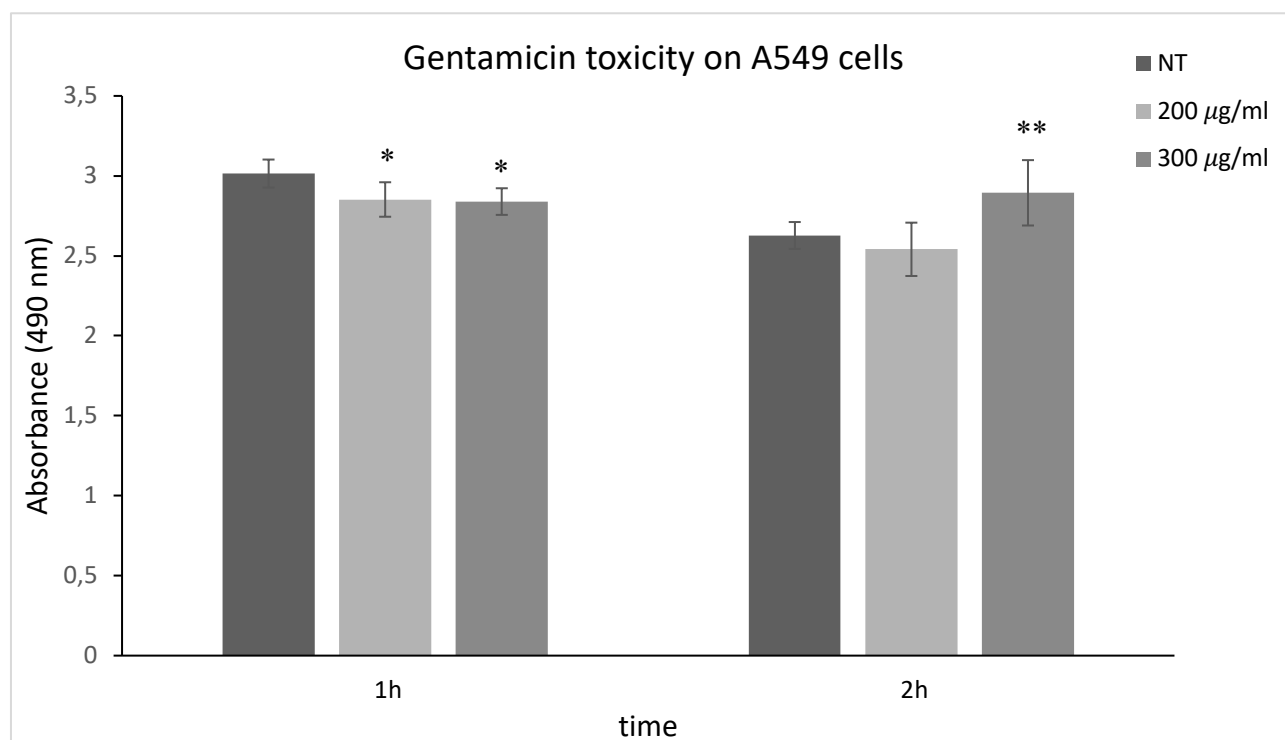

**Figure S5.** Effect of gentamicin on A549 immortalized cell lines. Dose-response plot of cells after 1 and 2 h incubation with increasing concentrations (200–300 µg/ml) of molecules. Cell viability was assessed by the MTT assay and expressed as described in the Materials and methods section. Values are given as means  $\pm$  SD (n = 6); \* indicates  $p < 0.05$ , \*\* indicates  $p < 0.01$  with respect to control cells.
